# Supplementary material for: Ancient Evolutionary Trade-Offs between Yeast Ploidy States
Source: PubMed Central journal article supplement (PMC3605057; doi:10.1371/journal.pgen.1003388), 2013-03-21
Supplement: pgen.1003388.s002.pdf [file pgen.1003388.s002.pdf]

### Lag

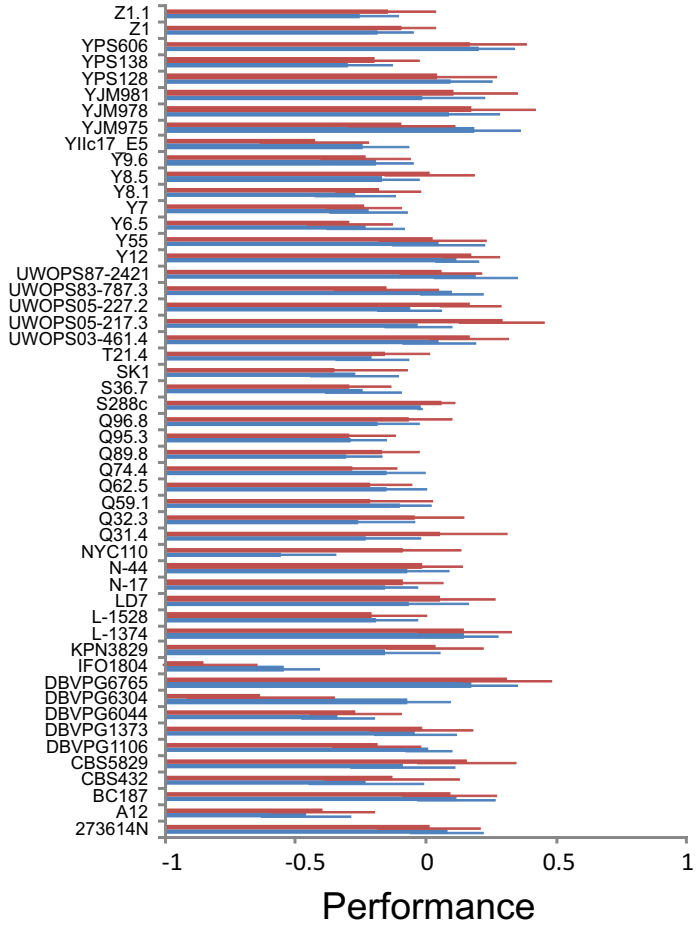

### Rate

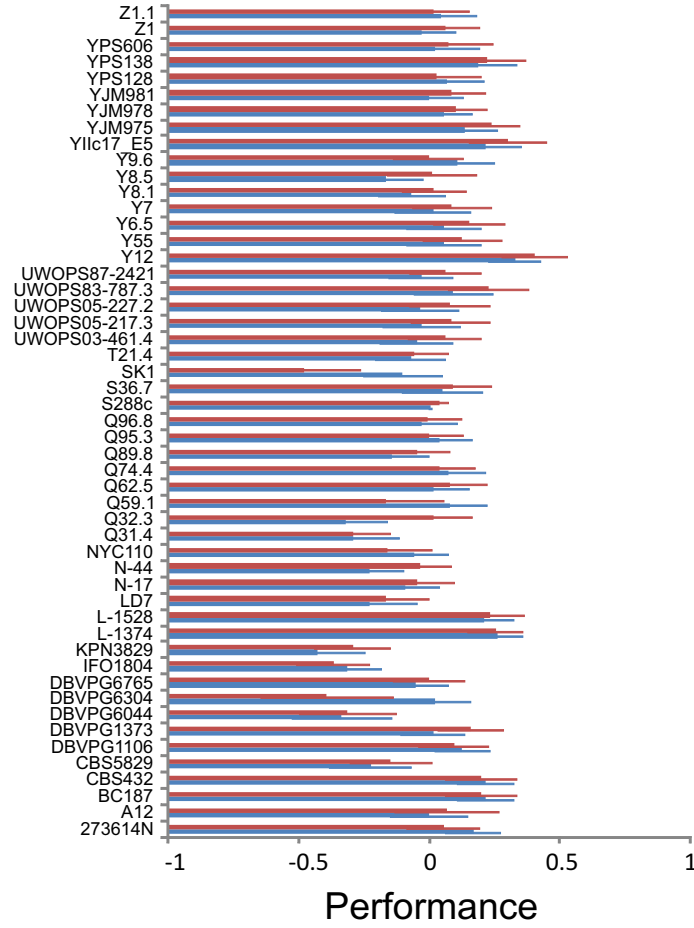

### Efficiency

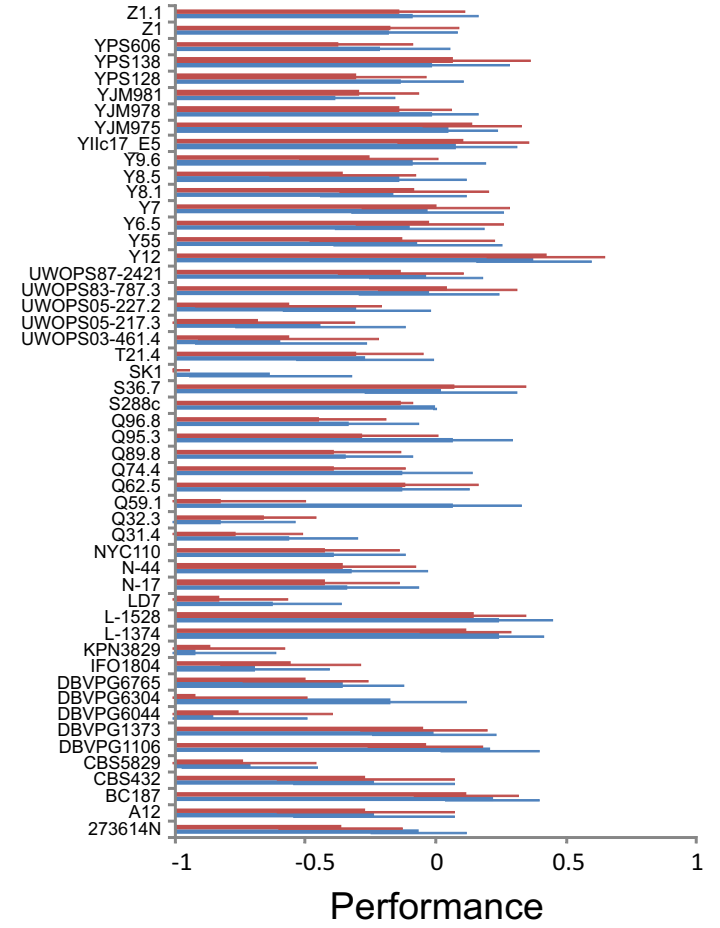

■ Diploid performance  
■ Haploid performance
