# Supplementary material for: Ancient Evolutionary Trade-Offs between Yeast Ploidy States
Source: PubMed Central journal article supplement (PMC3605057; doi:10.1371/journal.pgen.1003388), 2013-03-21

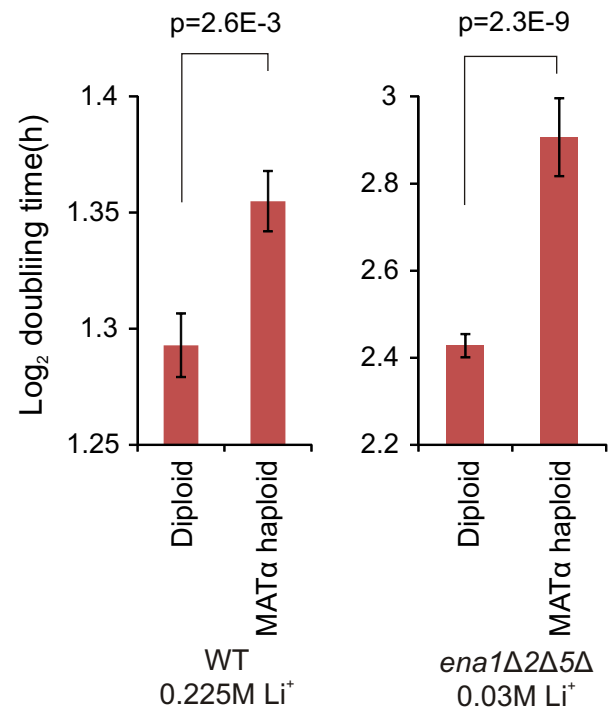

Supplement: pgen.1003388.s006.pdf [file pgen.1003388.s006.pdf]
